# Supplementary material
Source: publisher site journal article supplement (https://static.cambridge.org/content/id/urn:cambridge.org:id:article:S1138741620000074/resource/name/S1138741620000074supp001.docx)
Supplement: Supplementary file 1 [file S1138741620000074supp001.docx]

Table S1.

*Parallel Analyses Performed Adding Gender, Age, and Previous Victimization Experience as Control Variables*

| Dependent Variable: | RWA T2 | | | Support for authoritarian systems | | |
| --- | --- | --- | --- | --- | --- | --- |
|  | Coeff. | *p* | | Coeff. | *p* | |
| Predictor: |  |  | |  |  | |
| RWA T1 | .64 | < .001 | | .49 | < .001 | |
| Risk perception | .25 | < .001 | | .20 | .01 | |
| Actual threat | –.07 | .20 | | –.08 | .18 | |
| Age | –.07 | .09 | | –.11 | .11 | |
| Gender | .02 | .64 | | .05 | .37 | |
| Victimization | –.02 | .62 | | .05 | .34 | |
| Mediator: |  | | Risk perception | | |  |
|  |  | Coeff. | | *p* |  | |
| RWA T1 |  | .26 | | < .001 |  | |
| Actual threat |  | .25 | | < .001 |  | |
| RWA T1*actual threat |  | .05 | | .45 |  | |
| Age |  | .07 | | .41 |  | |
| Gender |  | –.16 | | .01 |  | |
| Victimization |  | .11 | | .07 |  | |

*Note.* Standardized coefficients are reported.
